# Supplementary material
Source: MDPI journal article supplement (https://www.mdpi.com/2254-9625/11/2/34)
Supplement: s1 [file s1]

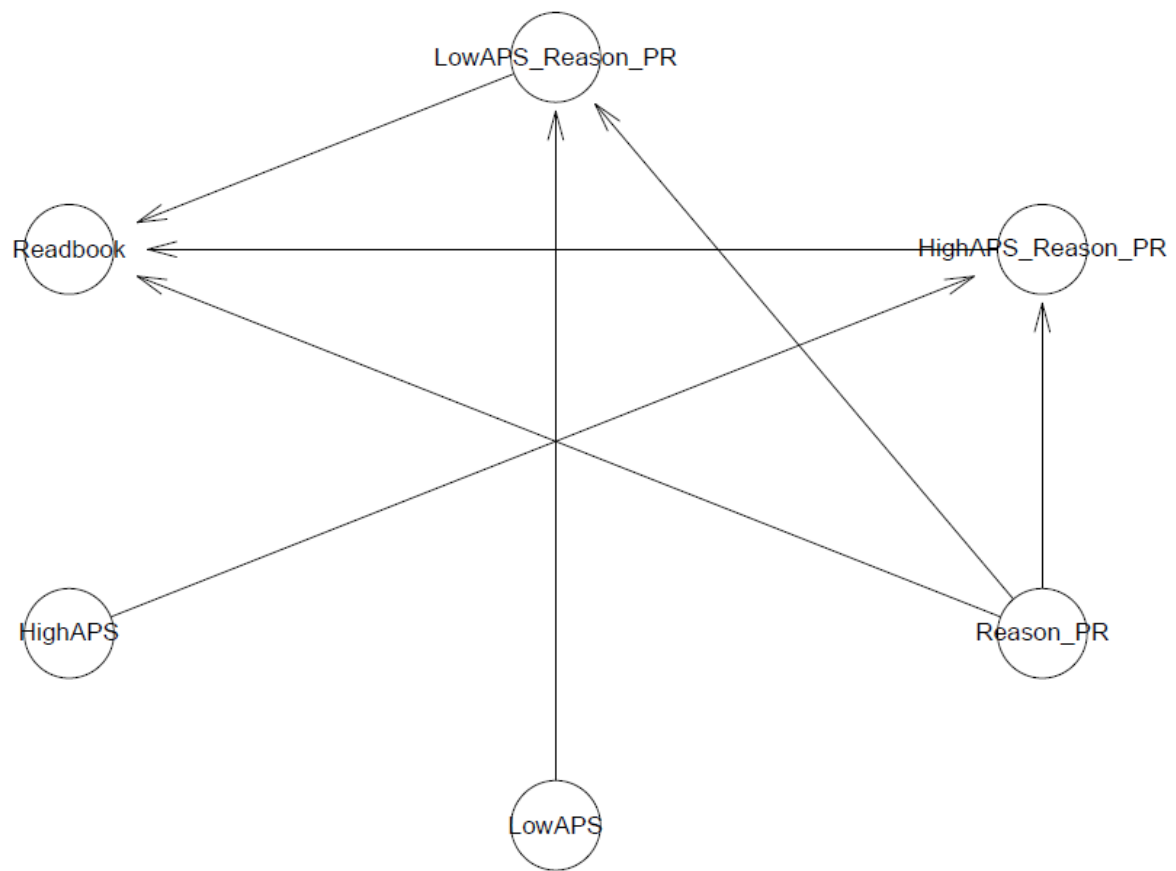

**Figure S1:** Model 1's logical network

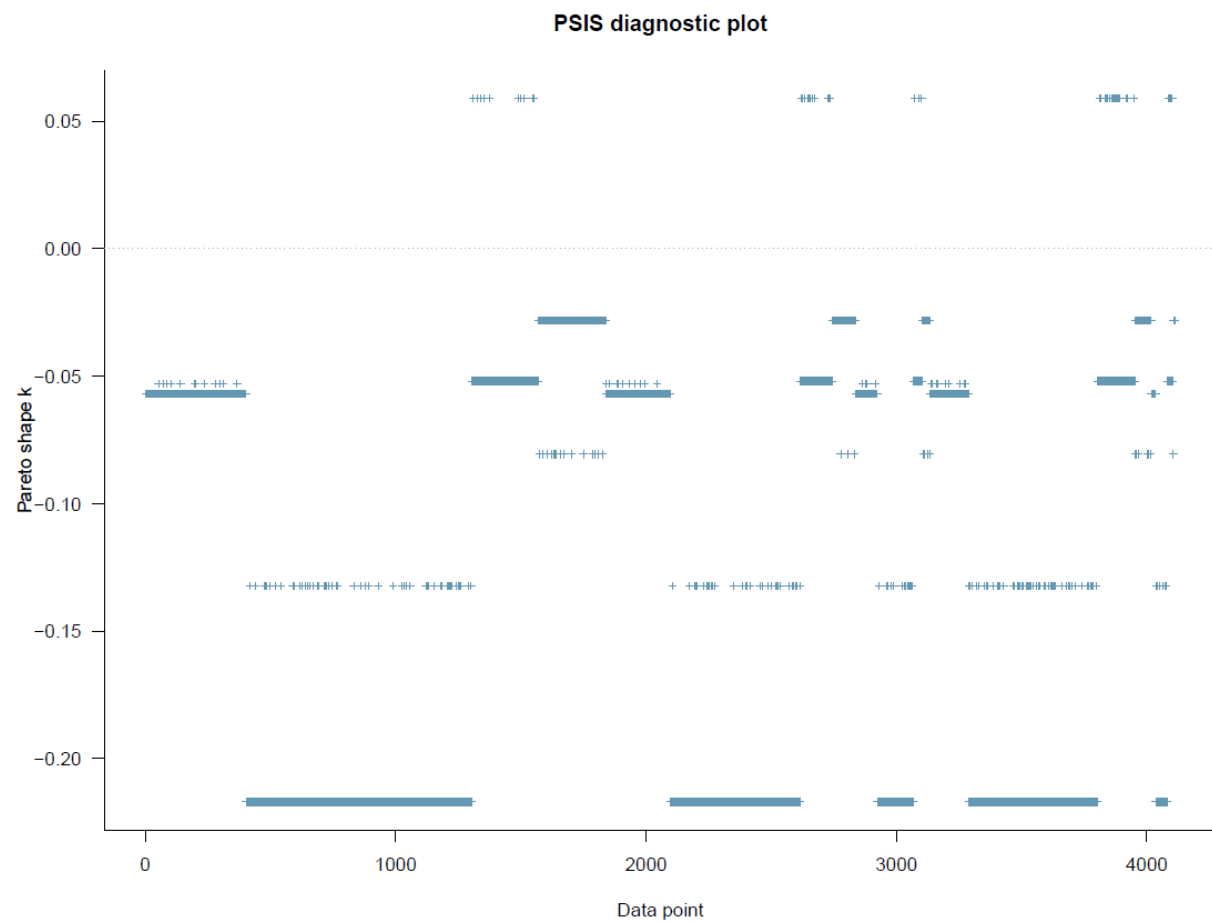

**Figure S2:** Model 1's PSIS diagnostic plot

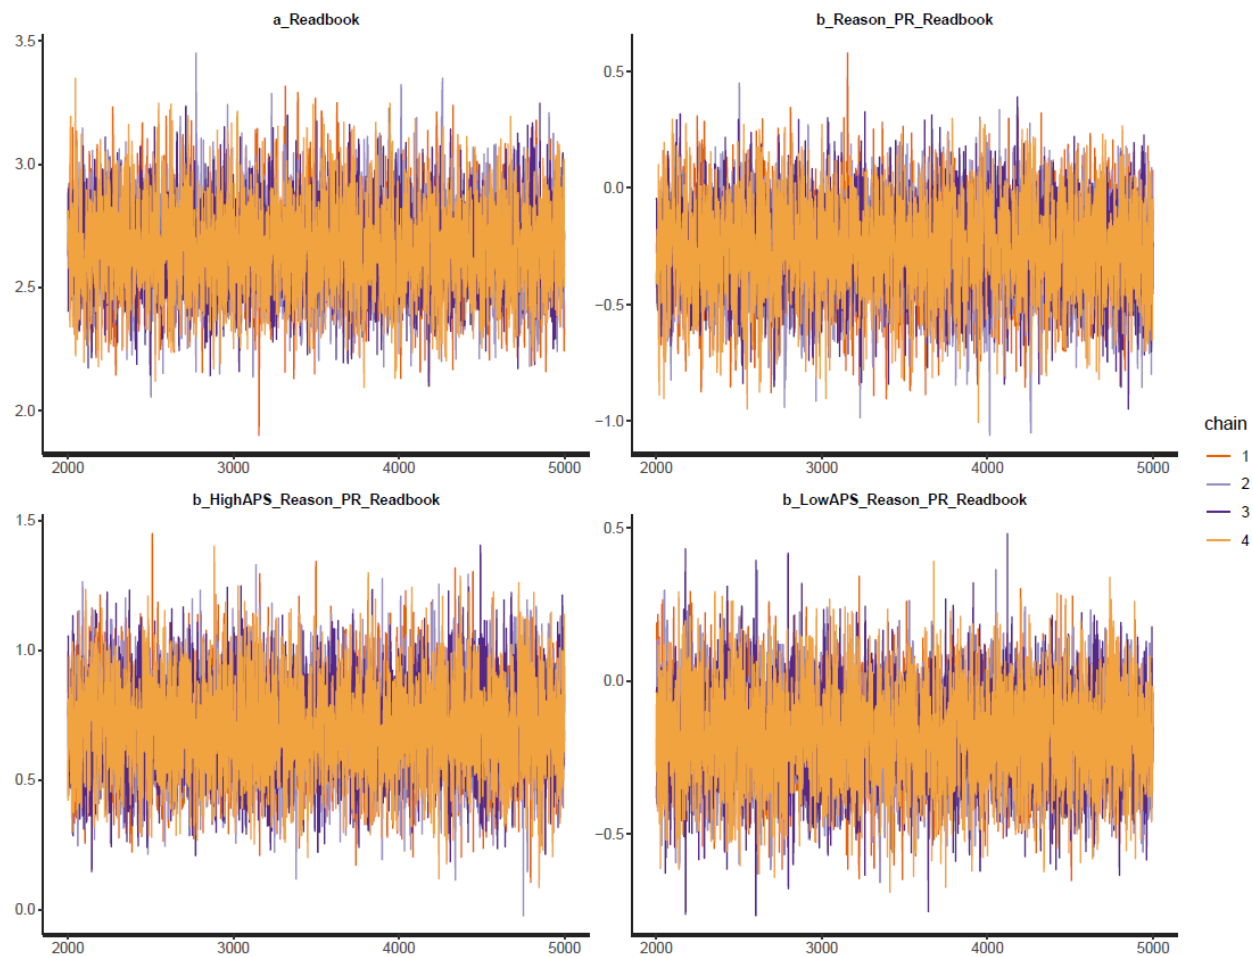

**Figure S3:** Trace plots for Model 1's posterior coefficients

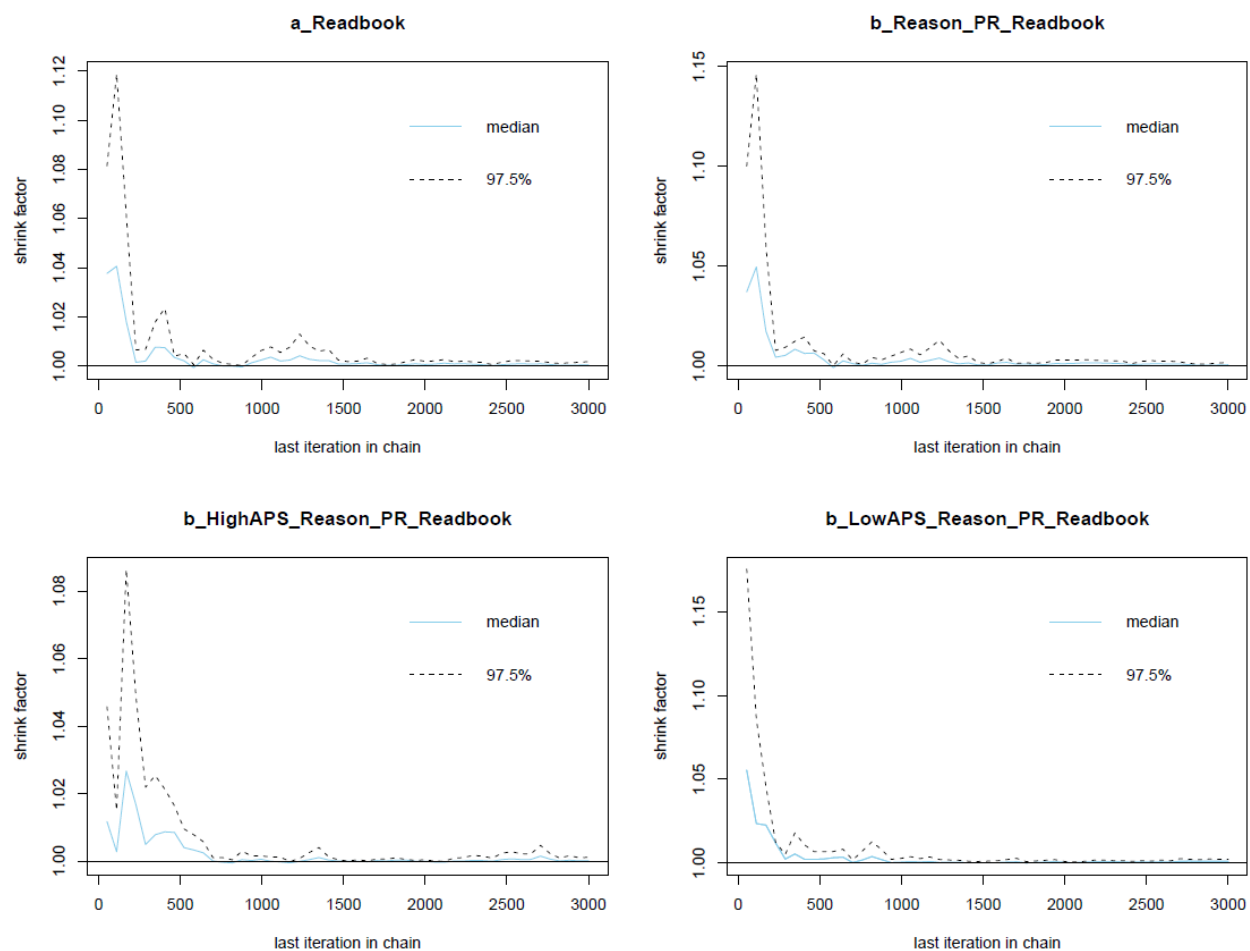

**Figure S4:** Gelman plots for Model 1's posterior coefficients

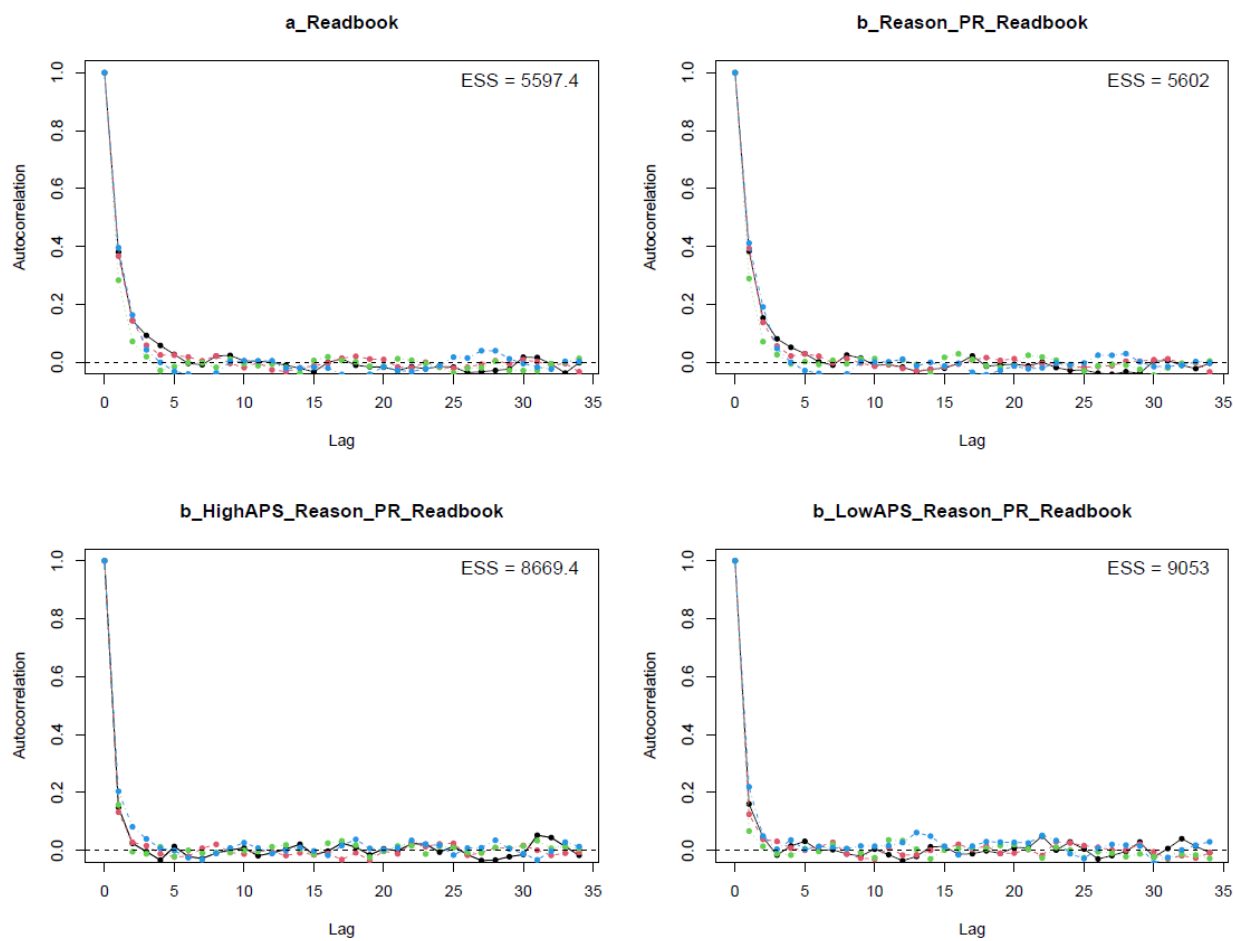

**Figure S5:** Autocorrelation plots for Model 1's posterior coefficients

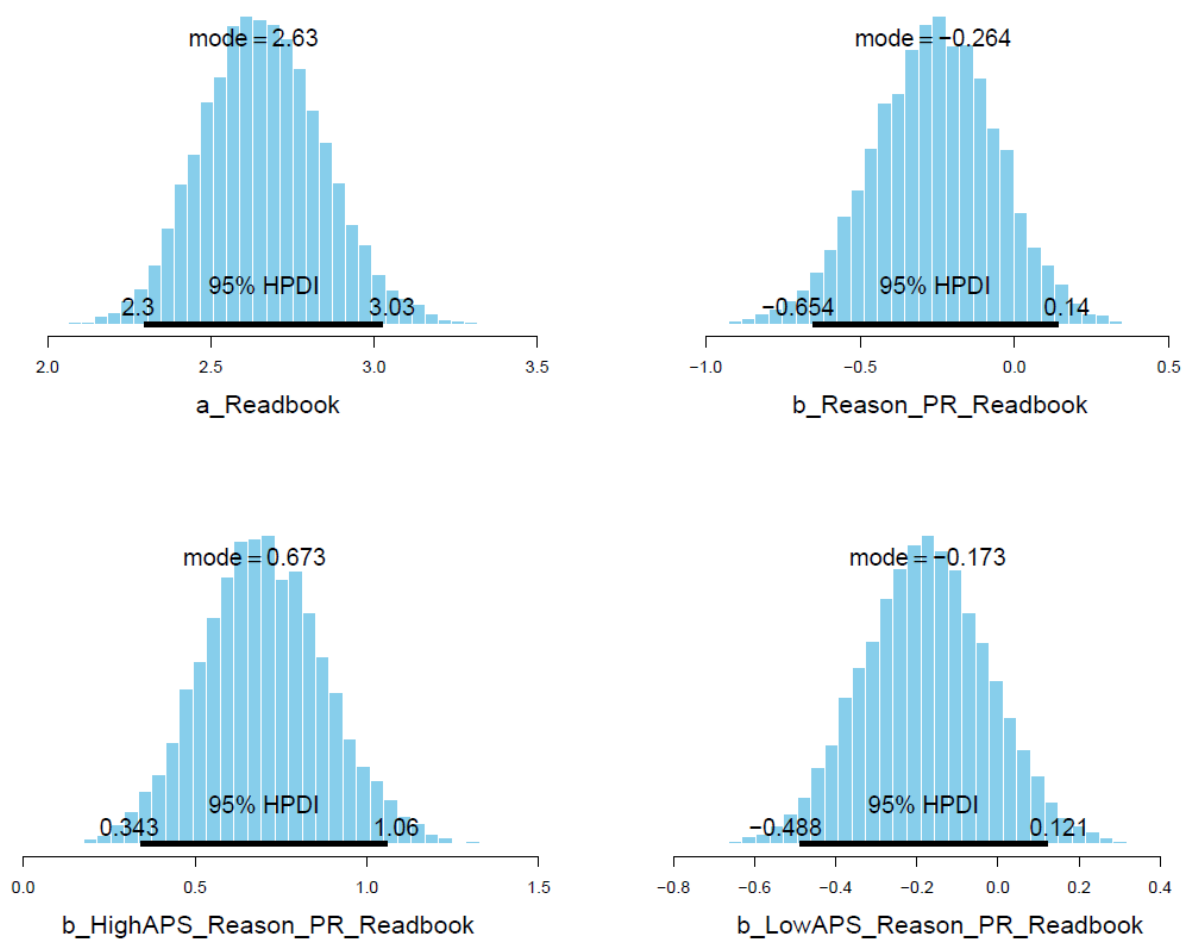

**Figure S6:** Distributions of Model 1's posterior coefficients with HPDI at 95%

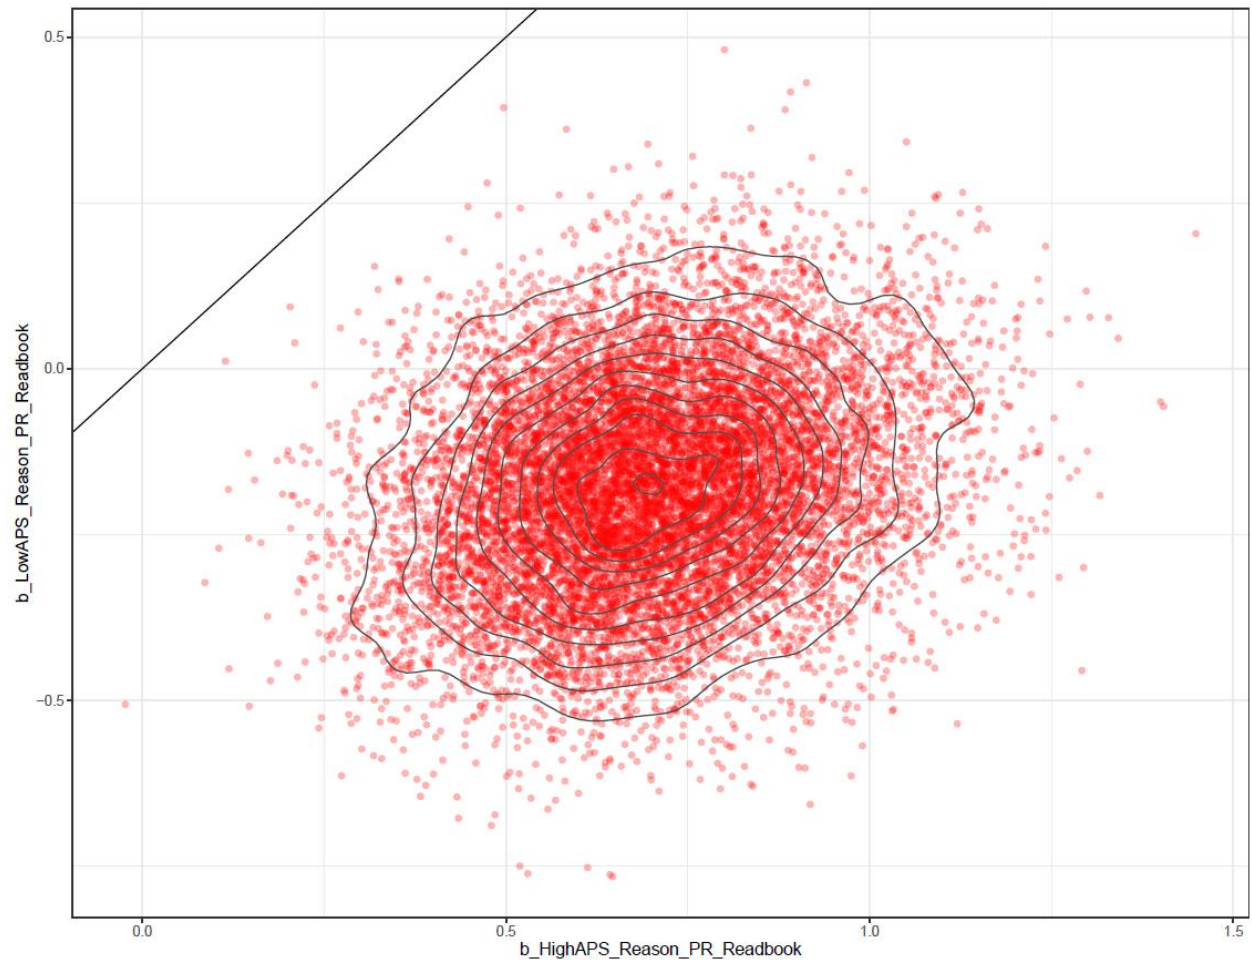

**Figure S7:** Pairwise distribution plot for model 1's *Reason\_PR\*HighAPS* and *Reason\_PR\*LowAPS*

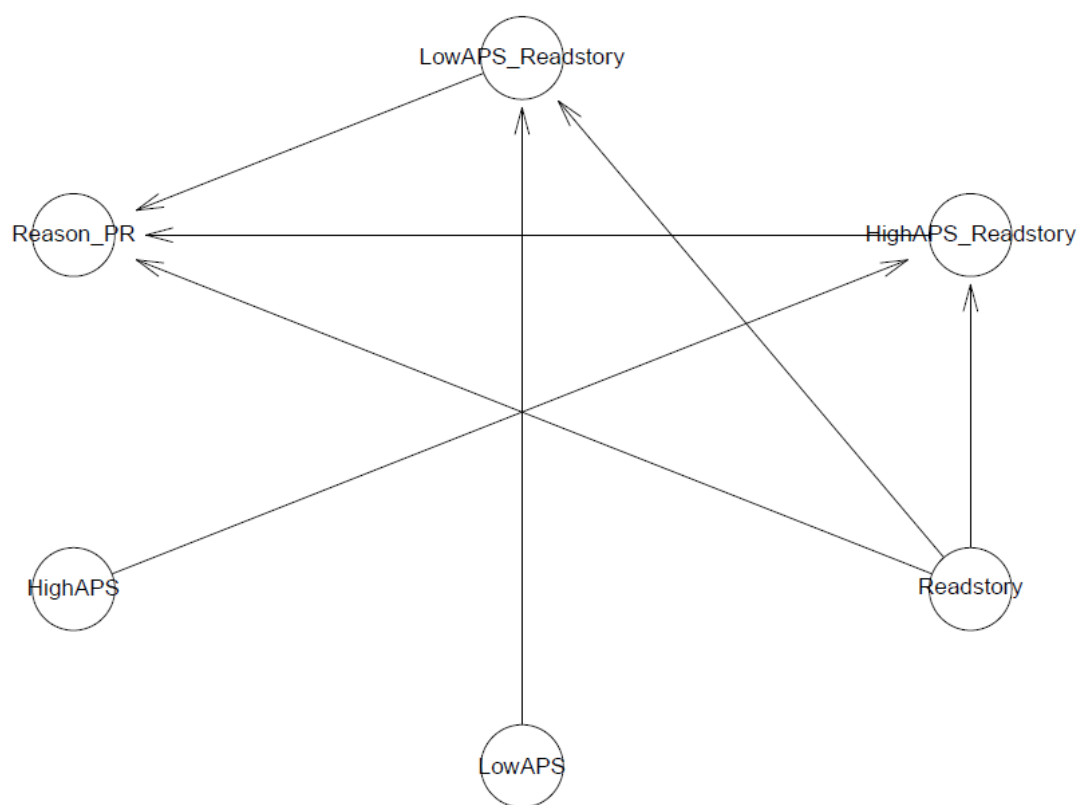

**Figure S8:** Model 2's logical network



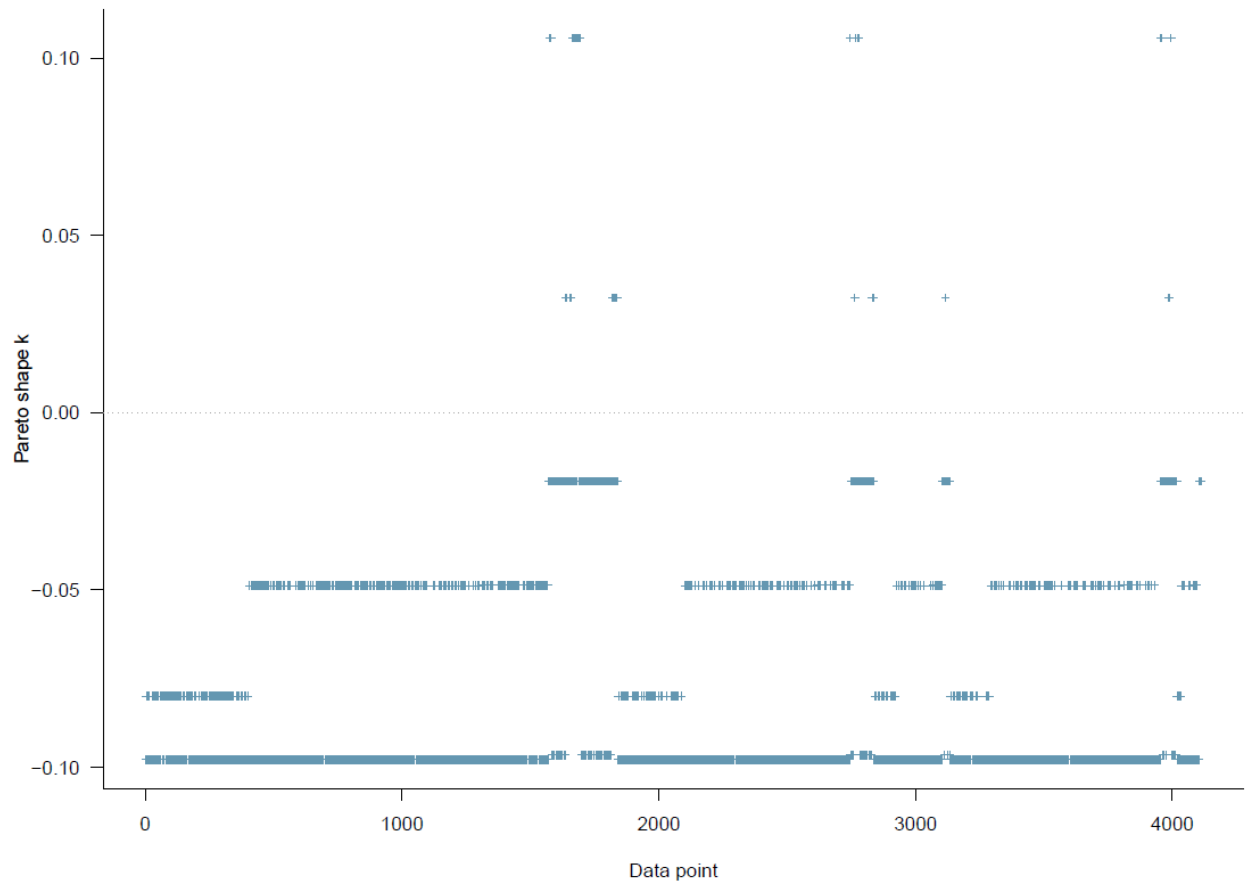

**Figure S9:** Model 2's PSIS diagnostic plot

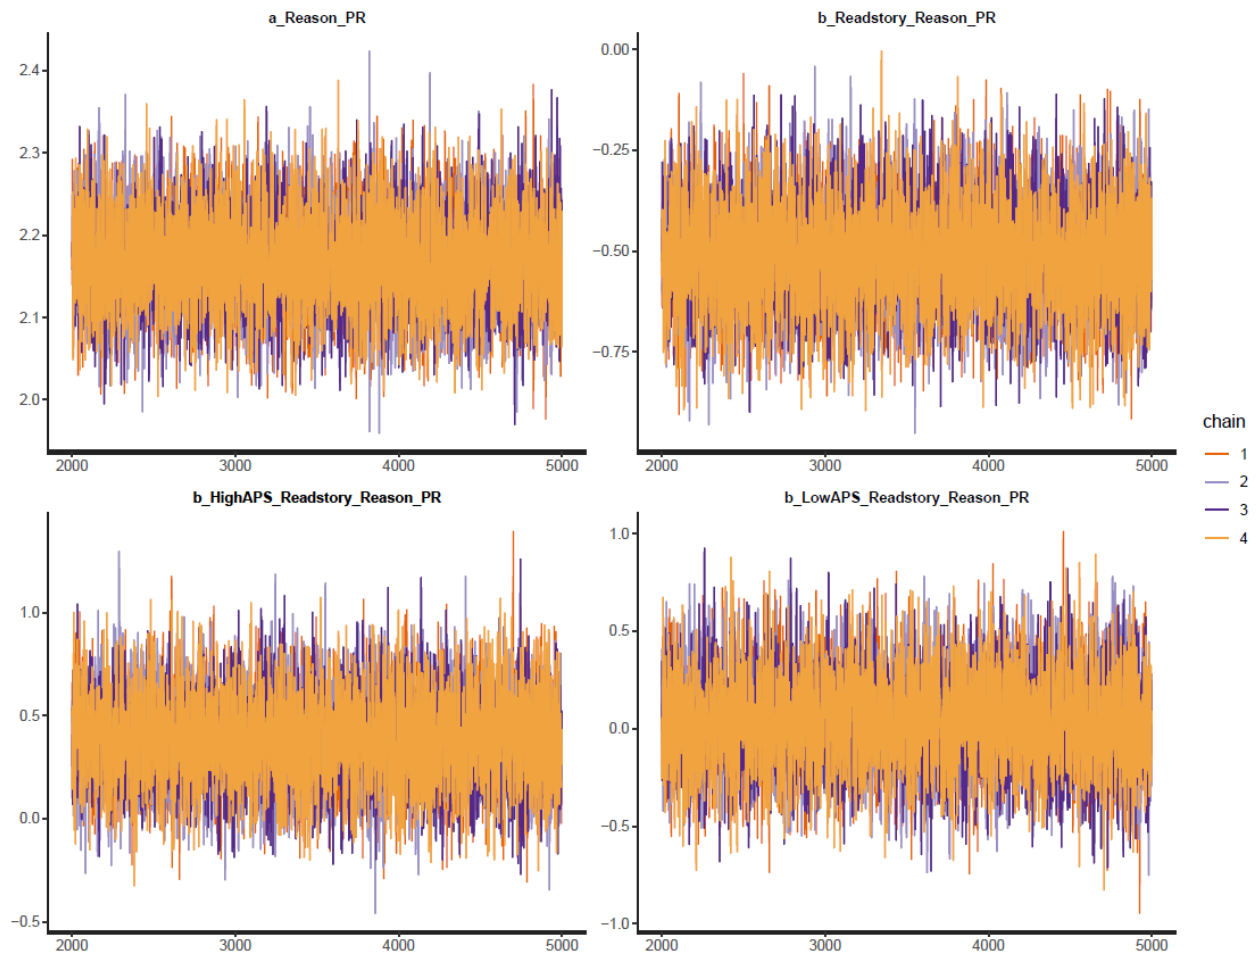

**Figure S10:** Trace plots for Model 2's posterior coefficients

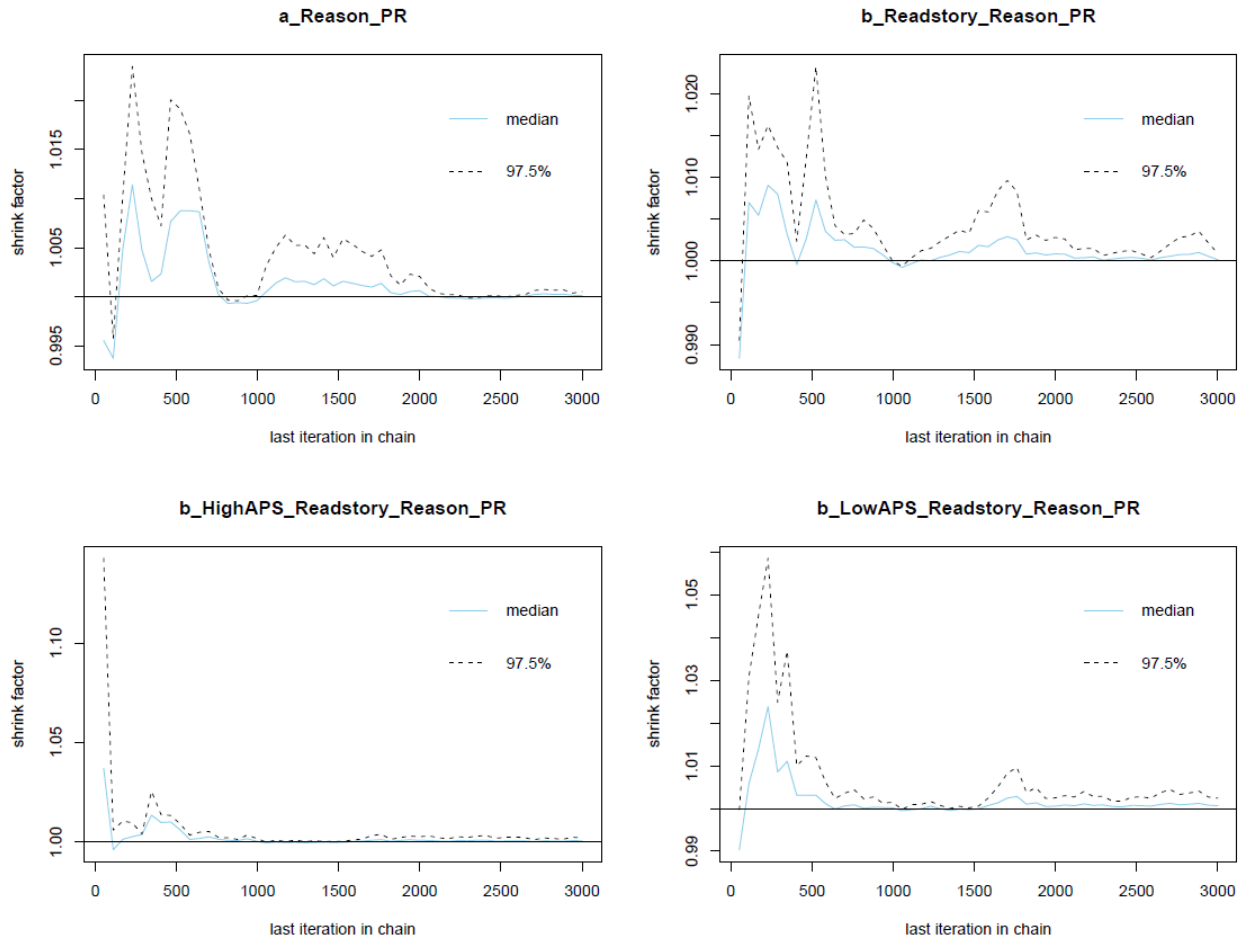

**Figure S11:** Gelman plots for Model 2's posterior coefficients

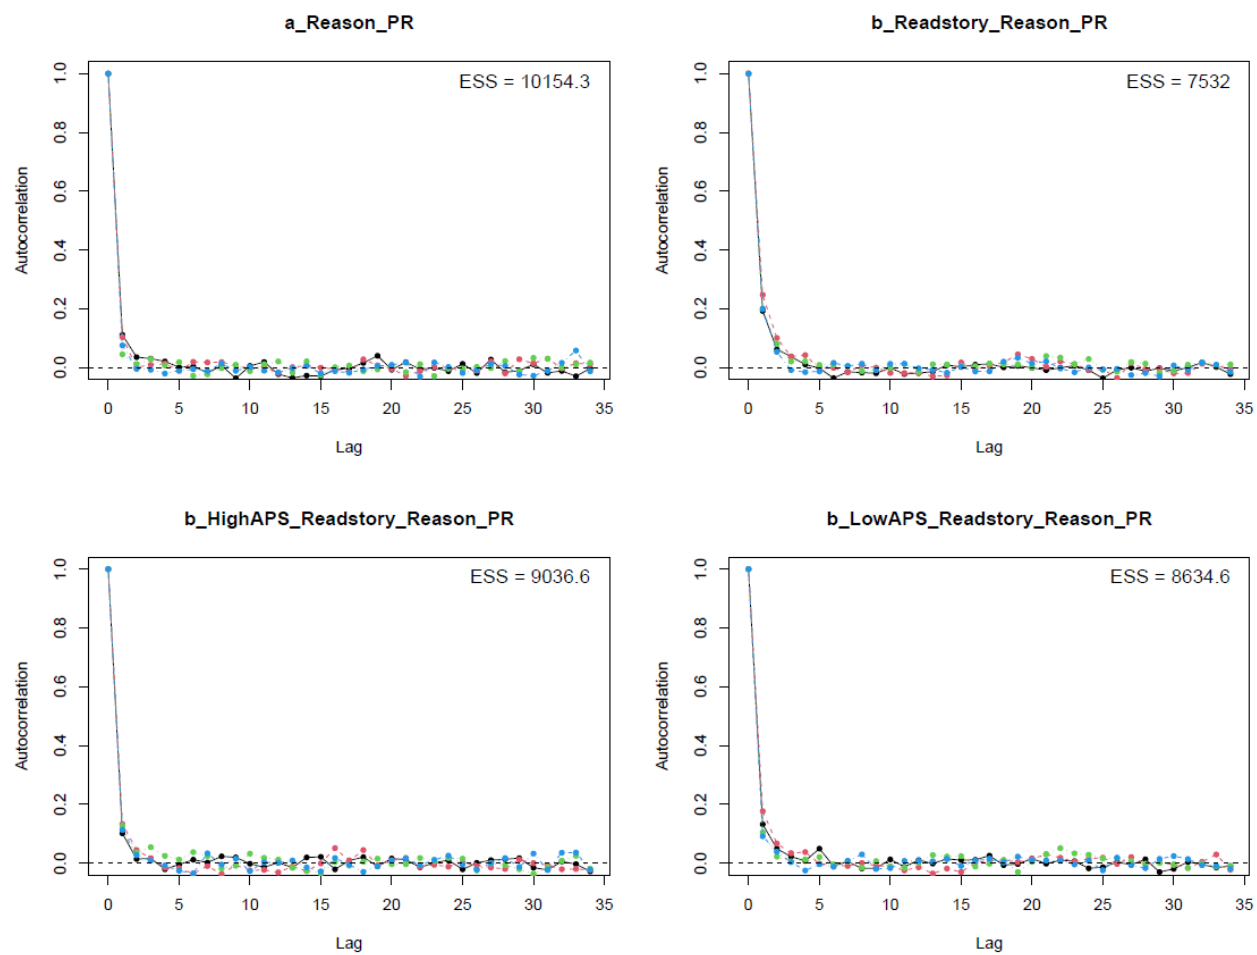

**Figure S12:** Autocorrelation plots for Model 2's posterior coefficients

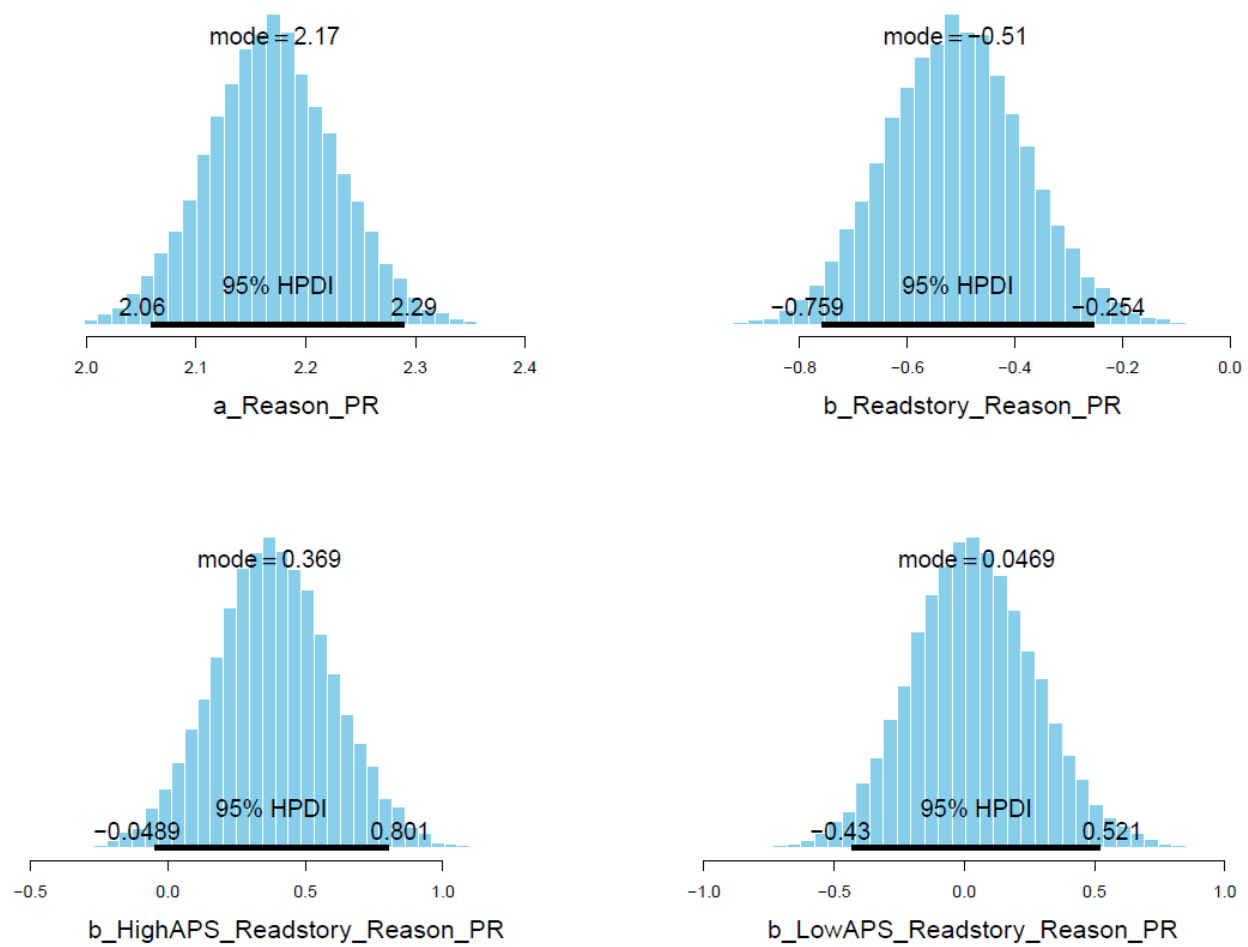

**Figure S13:** Distributions of Model 2's posterior coefficients with HPDI at 95%

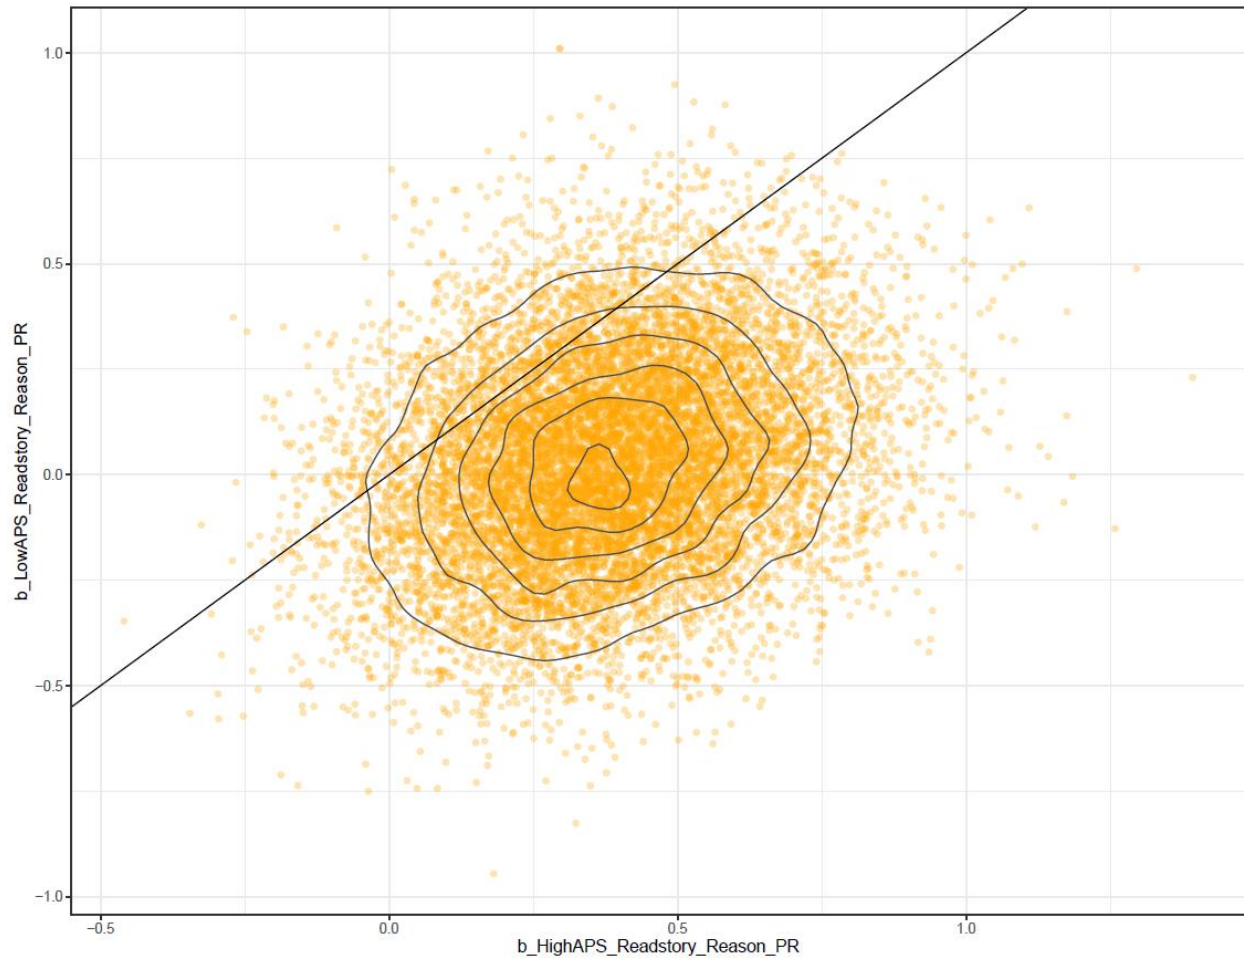

**Figure S14:** Pairwise distribution plot for model 2's *Readstory\*HighAPS* and *Readstory\*LowAPS*

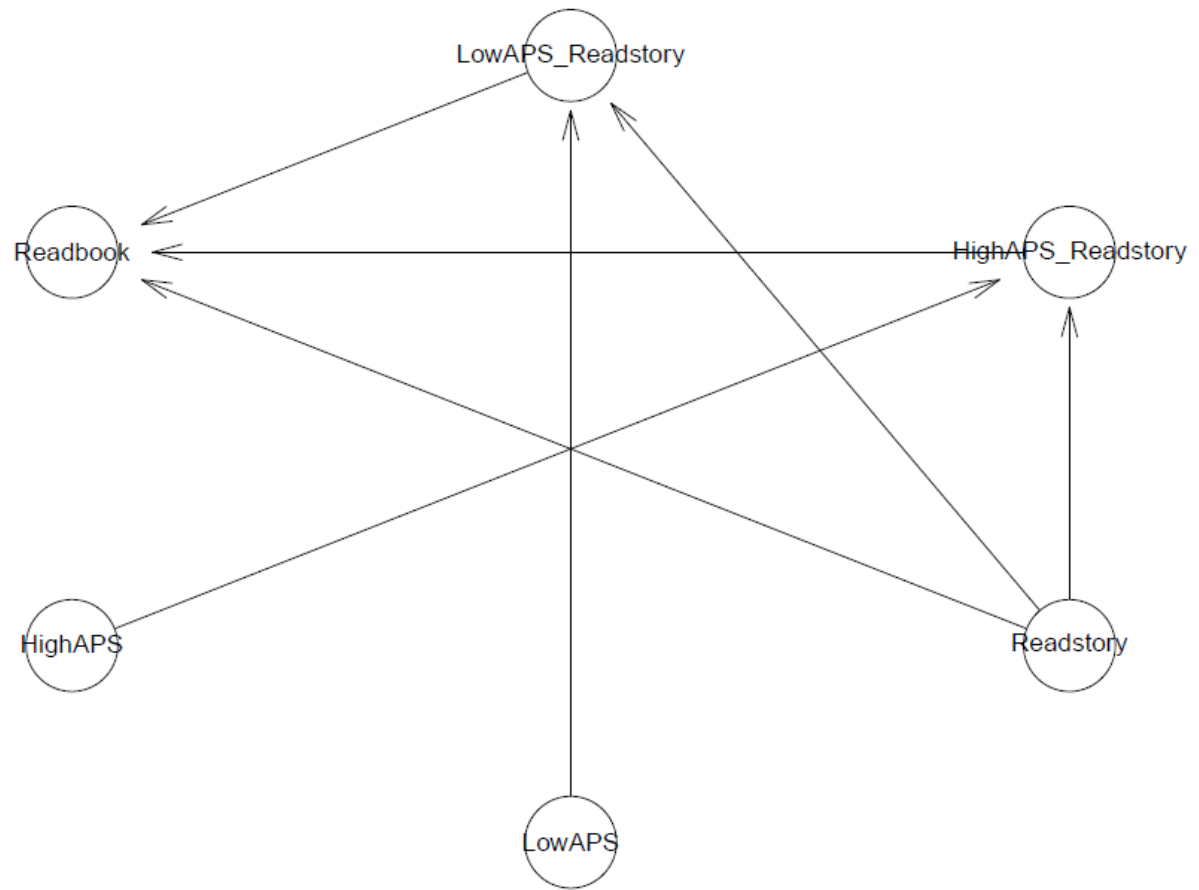

**Figure S15:** Model 3's logical network

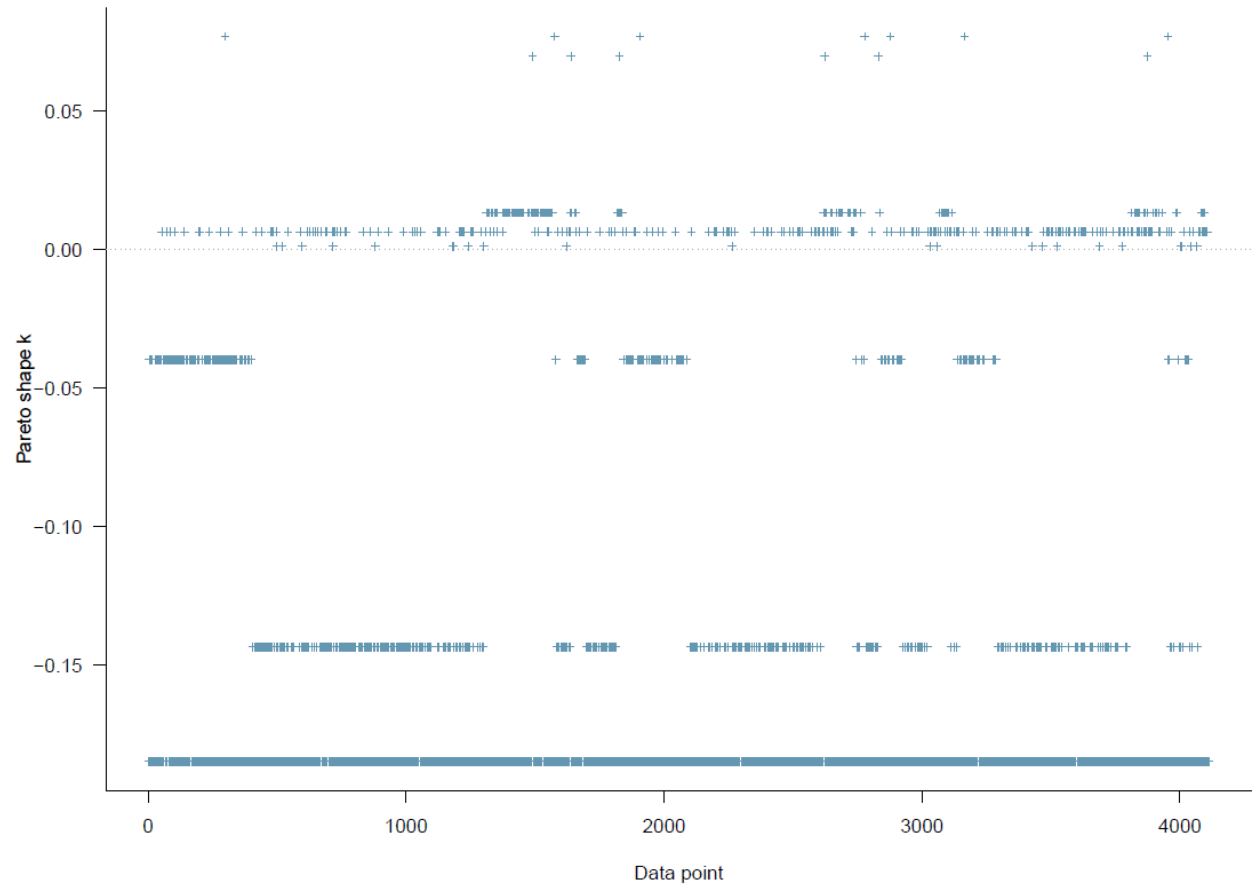

**Figure S16:** Model 3's PSIS diagnostic plot



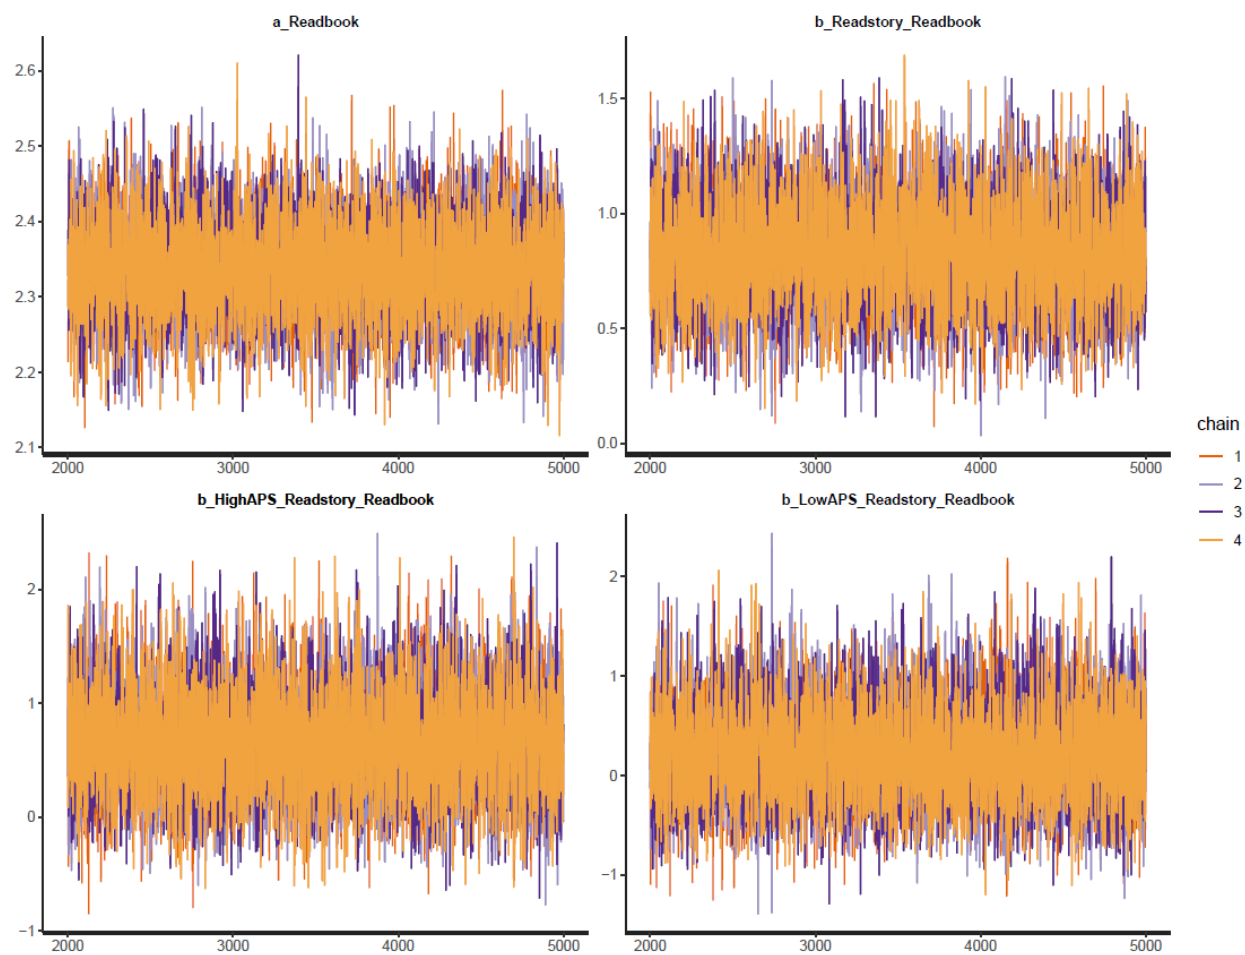

**Figure S17:** Trace plots for Model 3's posterior coefficients

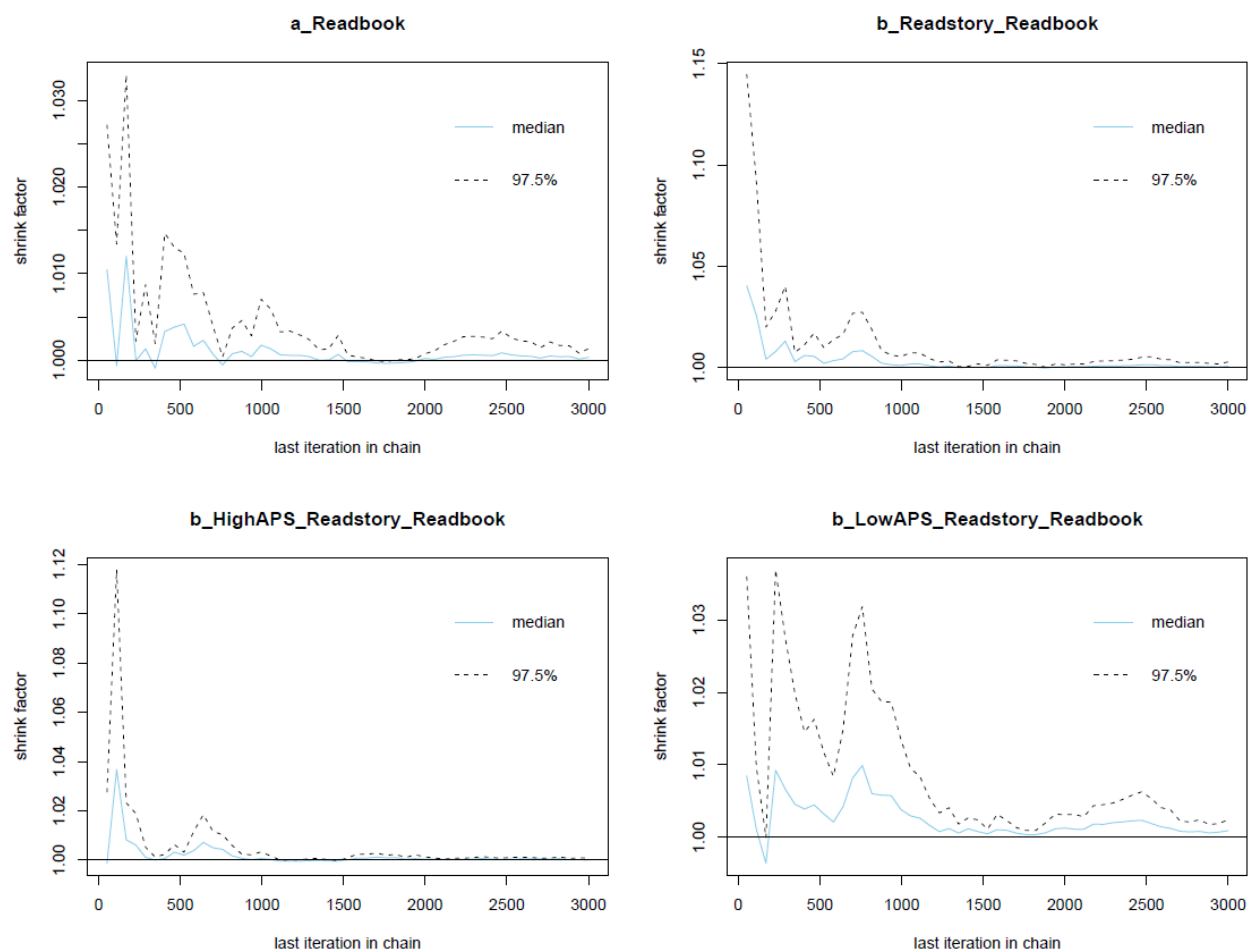

**Figure S18:** Gelman plots for Model 3's posterior coefficients

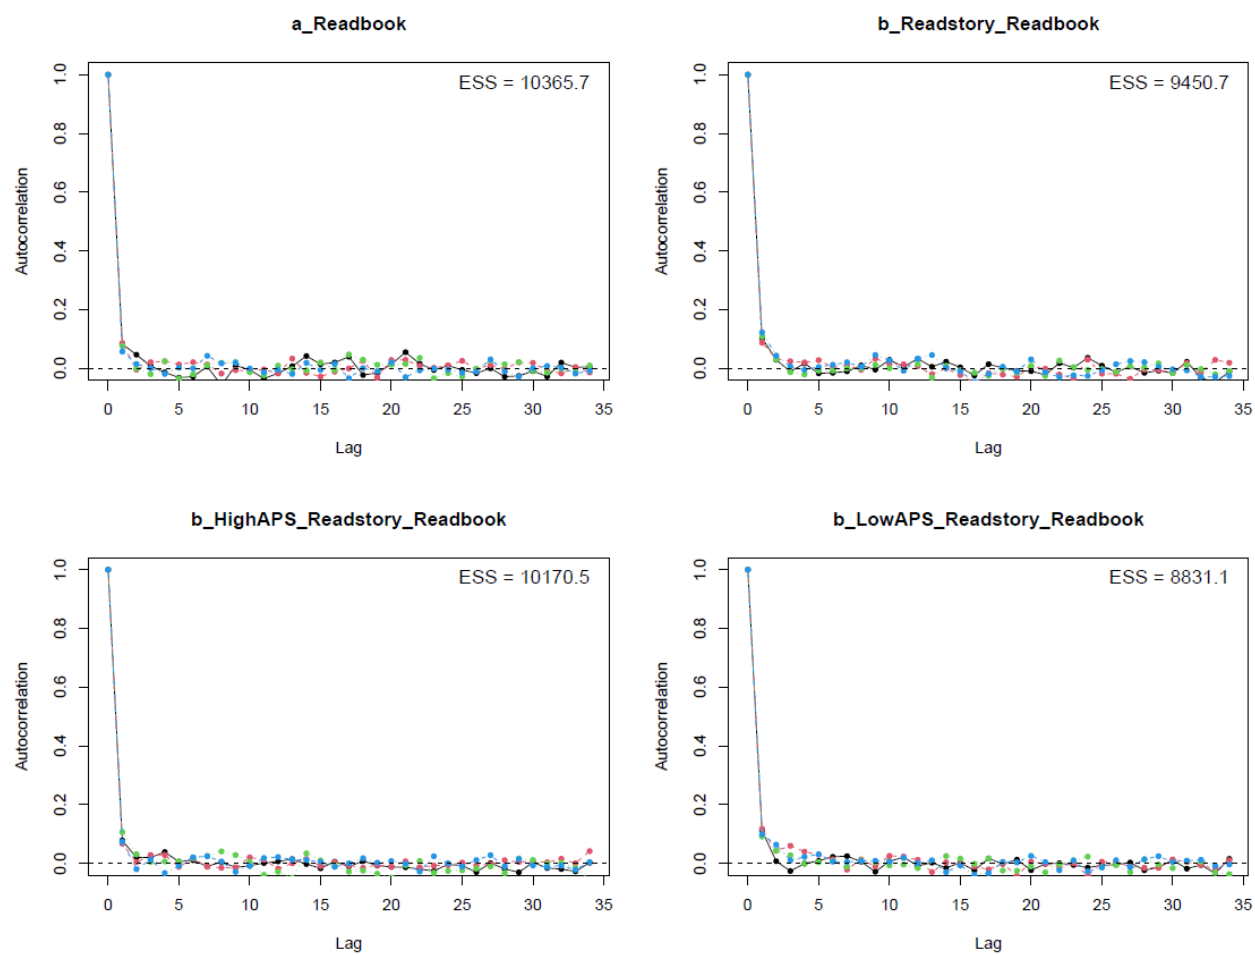

**Figure S19:** Autocorrelation plots for Model 3's posterior coefficients

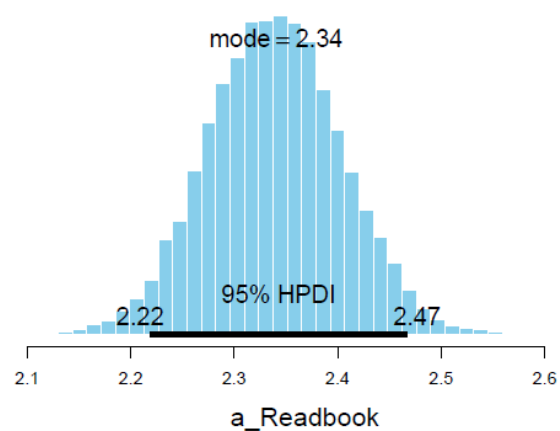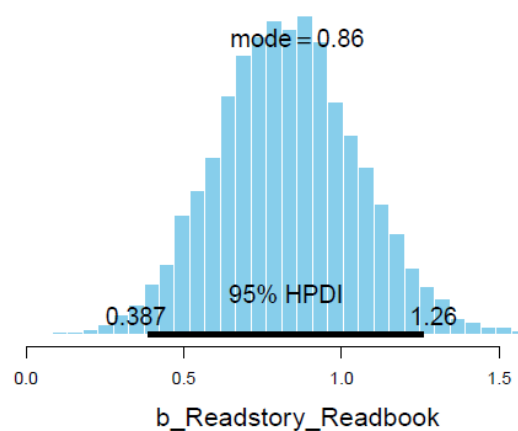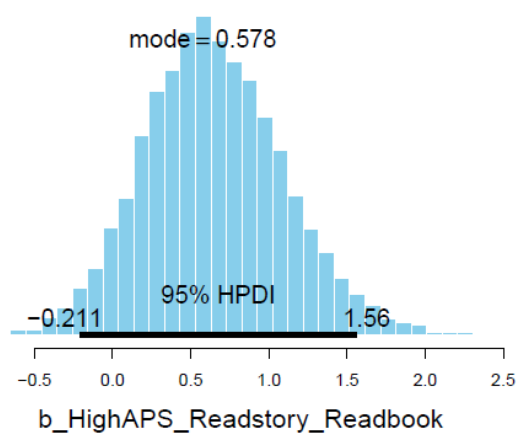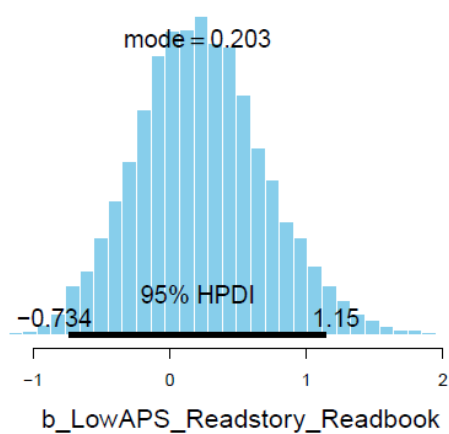

**Figure S20:** Distributions of Model 3's posterior coefficients with HPDI at 95%

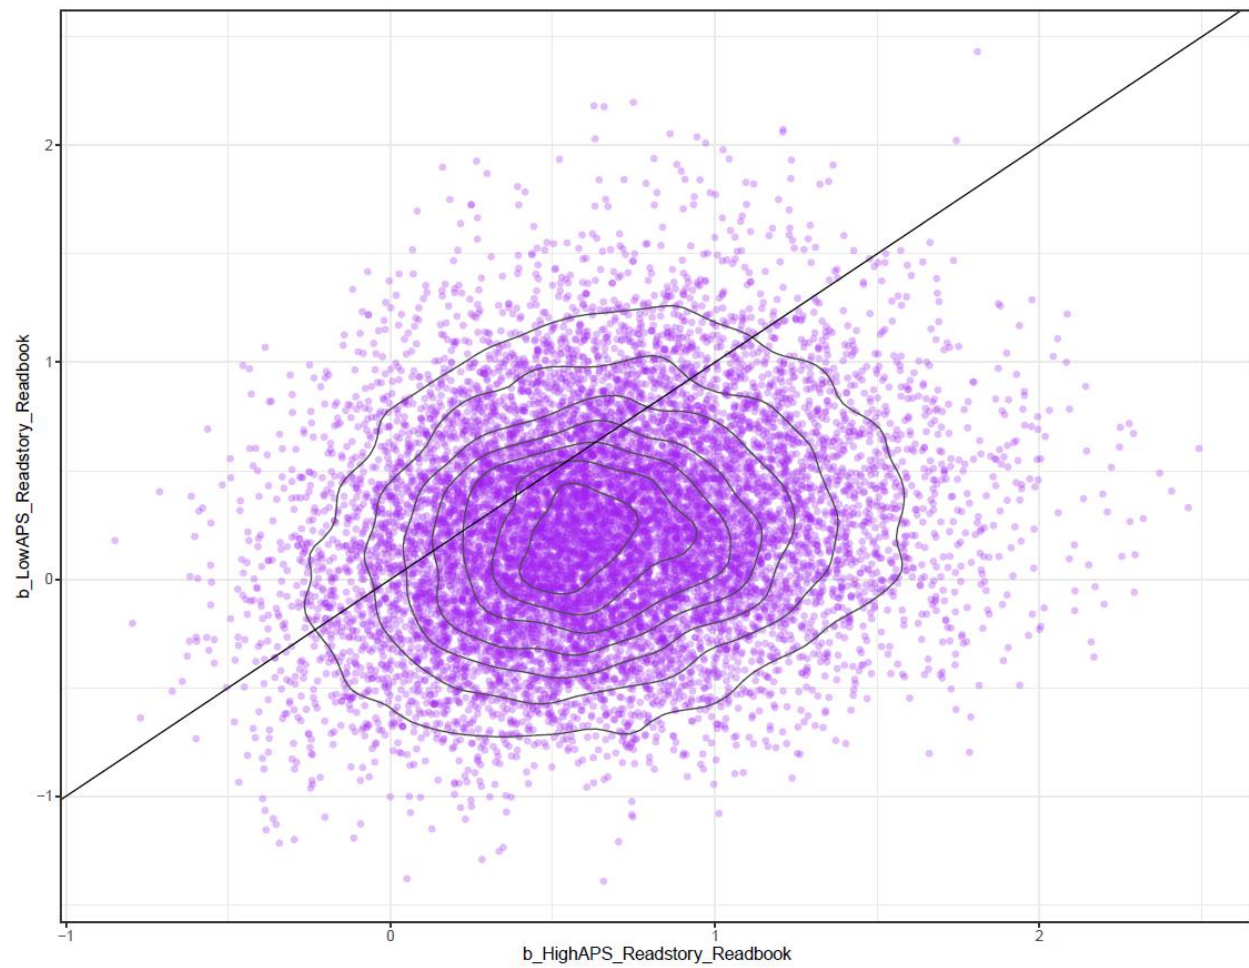

**Figure S21:** Pairwise distribution plot for model 3's *Readstory\*HighAPS* and *Readstory\*LowAPS*
